# Supplementary material for: Multi-scale Synergistic Effects Enhanced Hierarchically Structured Polycrystalline Diamond for Exceptional Hardness and Toughness
Source: Research Square preprint supplement (doi:10.21203/rs.3.rs-8711962/v1), 2026-02-12
Supplement: Supplementary file 1 [file 7a355562cc57bd3ec130669a.docx]

**Multi-scale Synergistic Effects Enhanced Hierarchically Structured Polycrystalline Diamond for Exceptional Hardness and Toughness**

Shuailing Maa,†, Yunfeng Shea,†, Min Liana,*, Xiao Maa, Shuo Yanga, Xingbin Zhaoa, Cun Youb, Pinwen Zhub, Tian Cuia,*

*a. School of Physical Science and Technology & Institute of High-Pressure Physics, Ningbo University, Ningbo 315211, China*

*b. Synergetic Extreme Condition High-Pressure Science Center, State Key Laboratory of Superhard Materials, College of Physics, Jilin University, Changchun 130012, China*

Email: [lianmin@nbu.edu.cn](mailto:lianmin@nbu.edu.cn); [cuitian@nbu.edu.cn](mailto:cuitian@nbu.edu.cn)

**Fig. S1** (a) XRD characterization of OLC and graphite raw materials; (b-d) Raman characterization of OLC and graphite raw materials and their fitting curves.
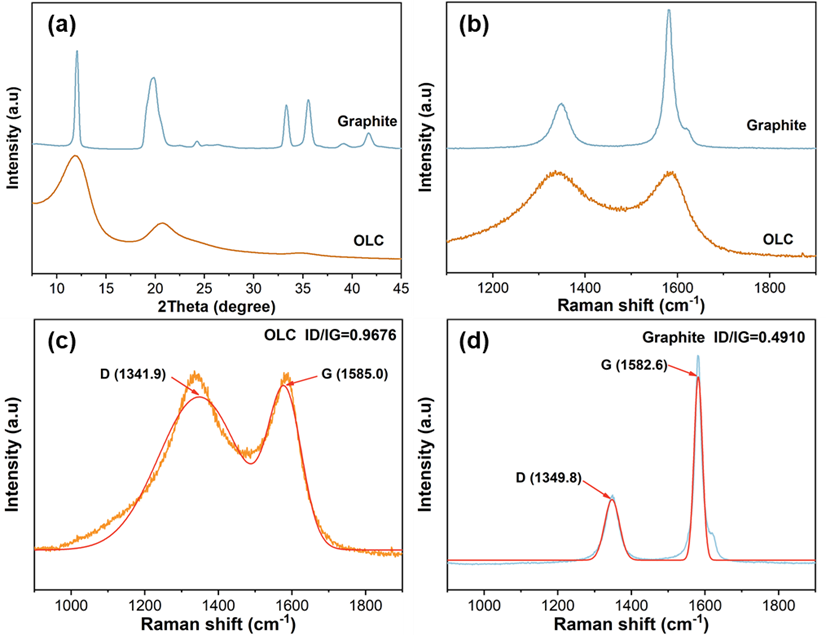


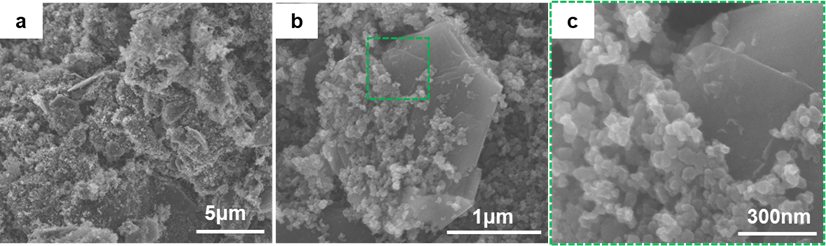


**Fig. S2** (a-b) SEM shows the surface morphology of OLC and graphite raw materials after mixing evenly. (c) Local enlarged view of the tight bonding of raw materials after being evenly mixed


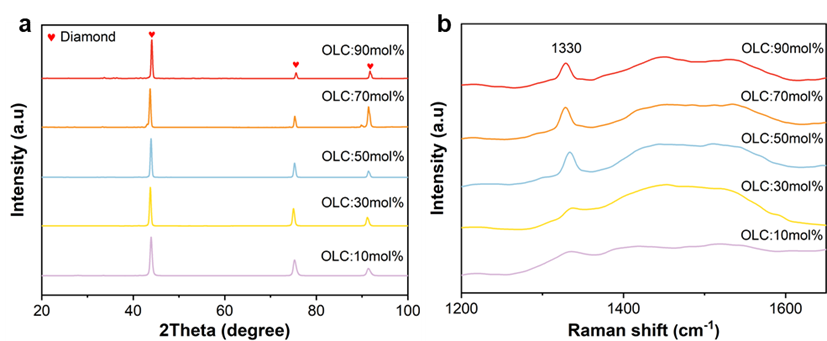


**Fig. S3** (a) XRD characterization of samples with different OLC and Graphite molar ratios; (b) Raman characterization of OLC and Graphite samples with different molar ratios.

**Table S1.** The precursor, number of HPHT runs, the grain size, hardness and fracture toughness of synthesized samples.

| Run number. | Name | OLC / Graphite | Synthesis condition (P / GPa, T / ℃) | Grain size (nm) | Hardness (GPa) | Fracture toughness (MPa∙m0.5) |
| --- | --- | --- | --- | --- | --- | --- |
| NBU-204 | HSPD-10 | 1:9 | 15 – 2000 | --- | 121.0 | 7.8 |
| NBU-199 | HSPD-30 | 3:7 | 15 – 2000 | 30 – 80 and 300 – 400 | 124.1 | 10.9 |
| NBU-193 | HSPD-50 | 1:1 | 15 – 2000 | 30 – 70 and 300 – 400 | 133.2 | 11.5 |
| NBU-188 | HSPD-70 | 7:3 | 15 – 2000 | 40 – 80 and 350 – 450 | 146.0 | 14.1 |
| NBU-202 | HSPD-90 | 9:1 | 15 – 2000 | --- | 116.9 | 10.4 |


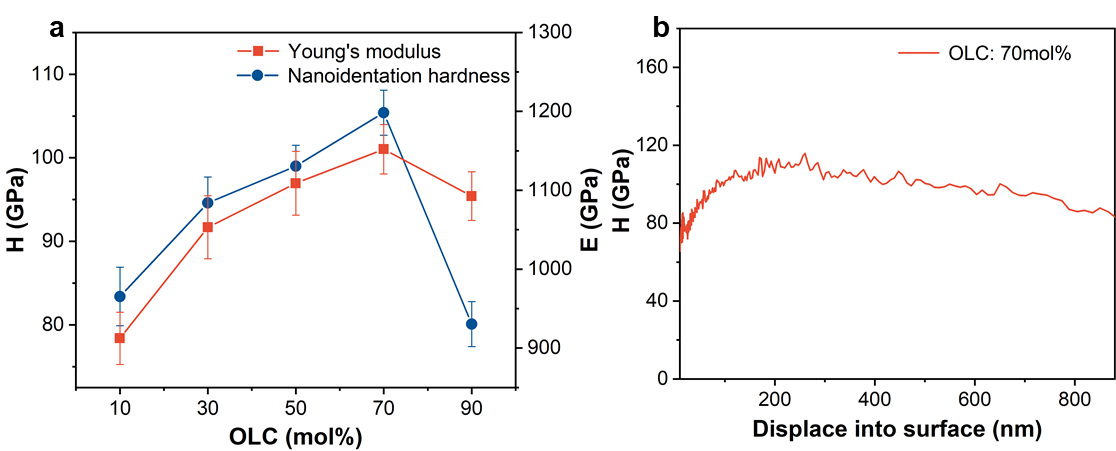
**Fig. S4** (a) Characterize nanoindentation hardness (H) and Young's modulus (E) of OLC and graphite samples with different molar ratios; (b) Continuous stiffness test curves for sample nanoindentation containing 70 mol% OLC.

**
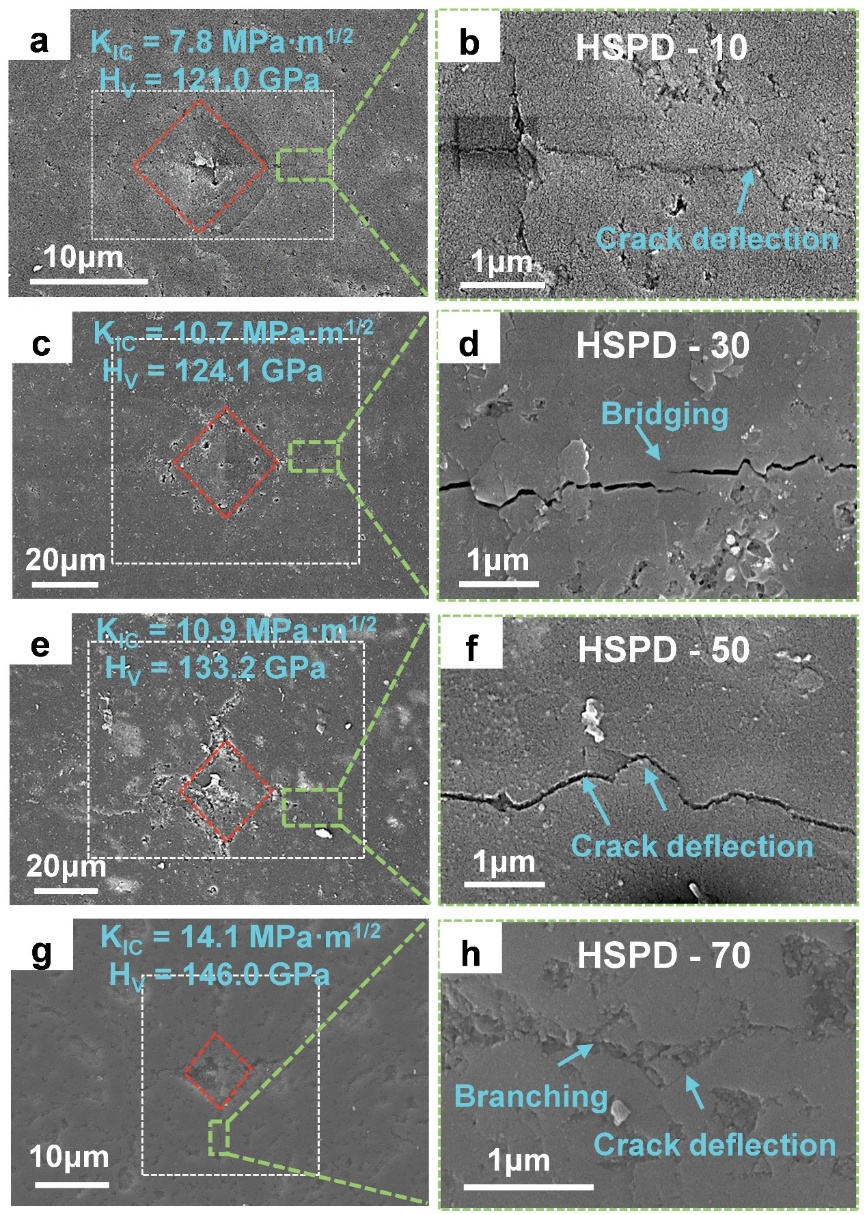
**

**Fig. S5.** Scanning-electron micrographs of indents produced at 19.6 N, together with higher-magnification views of the radial cracks used for toughness evaluation for (a, b) 30 mol % OLC, (c, d) 50 mol % OLC, (e, f) 70 mol % OLC.


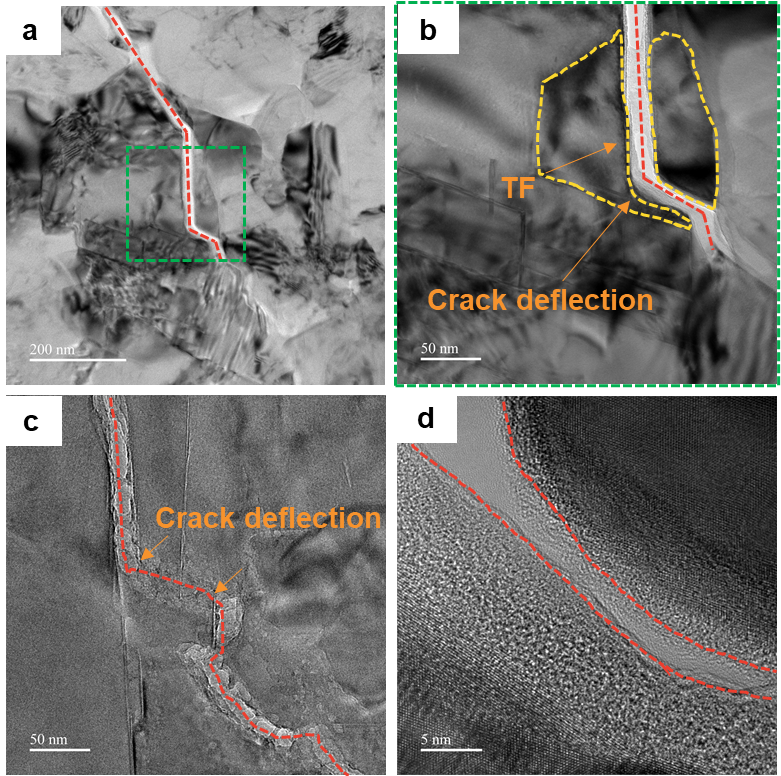


**Fig. S6.** TEM shows some additional descriptions of supplemental toughening mechanisms for samples containing 70 mol% OLC


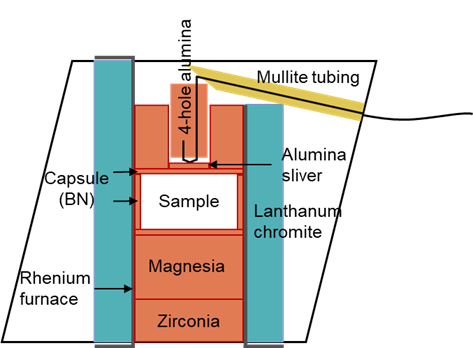


**Fig. S7** Standard 10/5 assembly drawing.
