# Supplementary material for: Multi-scale Synergistic Effects Enhanced Hierarchically Structured Polycrystalline Diamond for Exceptional Hardness and Toughness
Source: Research Square preprint supplement (doi:10.21203/rs.3.rs-8711962/v1), 2026-02-12
Supplement: Supplementary file 2 [file a19c25ea7ae0362468ac3fb2.docx]

**Table S1.** The precursor, number of HPHT runs, the grain size, hardness and fracture toughness of synthesized samples.

| Run number. | Name | OLC / Graphite | Synthesis condition (P / GPa, T / ℃) | Grain size (nm) | Hardness (GPa) | Fracture toughness (MPa∙m0.5) |
| --- | --- | --- | --- | --- | --- | --- |
| NBU-204 | HSPD-10 | 1:9 | 15 – 2000 | --- | 121.0 | 7.8 |
| NBU-199 | HSPD-30 | 3:7 | 15 – 2000 | 30 – 80 and 300 – 400 | 124.1 | 10.9 |
| NBU-193 | HSPD-50 | 1:1 | 15 – 2000 | 30 – 70 and 300 – 400 | 133.2 | 11.5 |
| NBU-188 | HSPD-70 | 7:3 | 15 – 2000 | 40 – 80 and 350 – 450 | 146.0 | 14.1 |
| NBU-202 | HSPD-90 | 9:1 | 15 – 2000 | --- | 116.9 | 10.4 |
